# Supplementary material for: Silica templating of a self-assembling peptide amphiphile that forms nanotapes
Source: Royal Society of Chemistry journal article supplement (doi:10.1039/c3sm52324a), 2014-01-01
Supplement: c3sm52324a1.pdf [file c3sm52324a1.pdf]

## Supporting Information

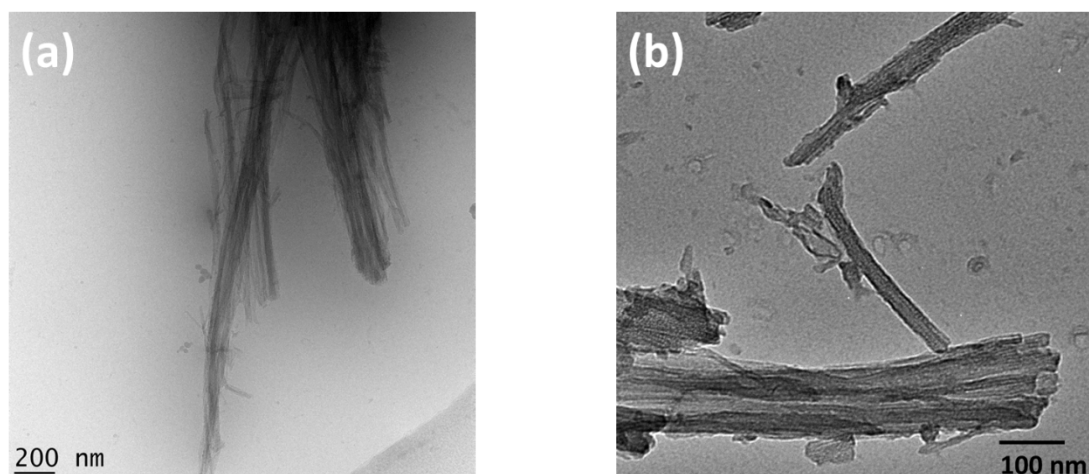

**SI Fig. 1.** Images of silica coated C<sub>16</sub>-KTTKS (a) cryo-TEM and (b) TEM .

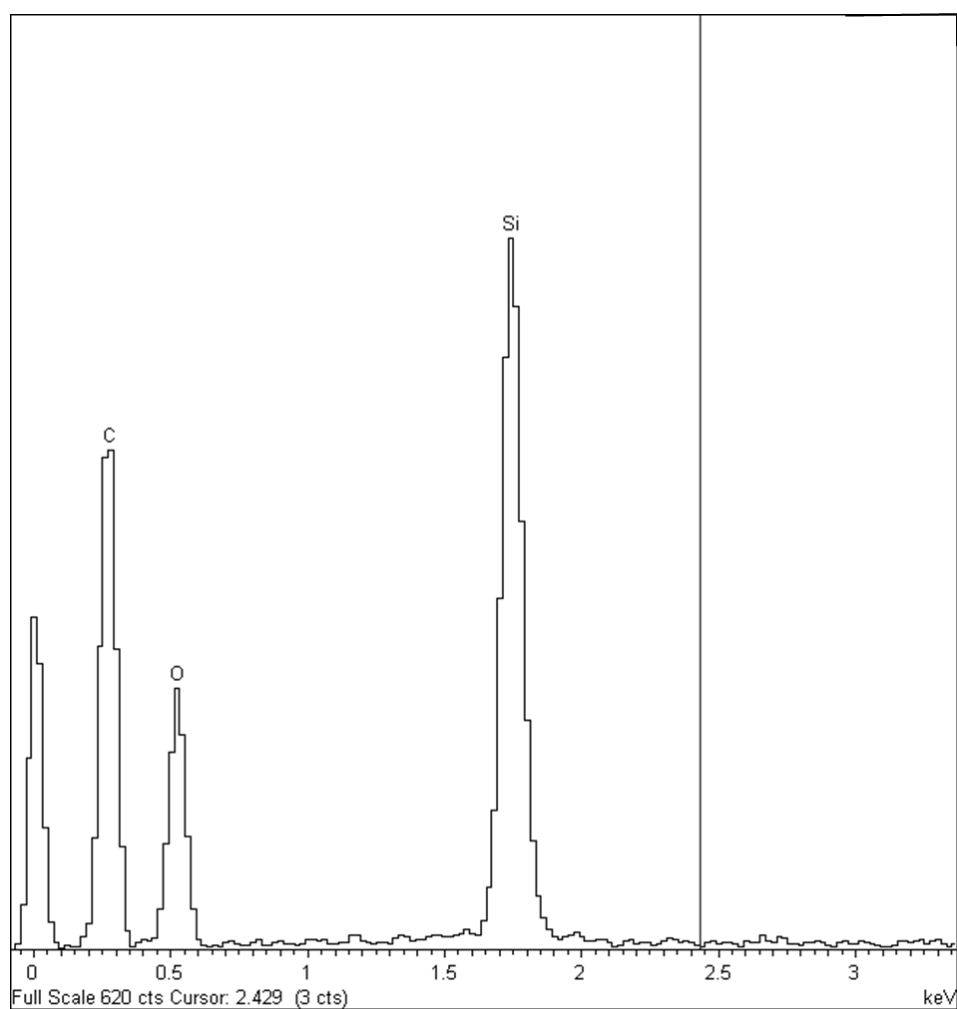

**SI Fig. 2.** EDX spectrum of the silica templated C<sub>16</sub>-KTTKS nanostructure.
